# Supplementary material for: Improving the analytical performance of electrothermal vaporization coupled to inductively coupled plasma optical emission spectrometry using a mixed-gas plasma
Source: Royal Society of Chemistry journal article supplement (doi:10.1039/c9ja00010k), 2019-01-01
Supplement: c9ja00010k1.pdf [file c9ja00010k1.pdf]

Table S1. Sensitivity, precision and detection limits (3s, n=10, 3 mg of soil) for Ar ICP and mixed-gas ICP (20 mL min<sup>-1</sup> N<sub>2</sub> as sheathing flow and 0.4 L min<sup>-1</sup> N<sub>2</sub> added to the plasma gas) in ETV-ICPOES

| Analyte | Wavelength (nm) | Sensitivity (counts µg <sup>-1</sup> ) |            |      | Detection limits (mg kg <sup>-1</sup> ) |            |      | RSD (%) |
|---------|-----------------|----------------------------------------|------------|------|-----------------------------------------|------------|------|---------|
|         |                 | Mixed-gas ICP (A)                      | Ar ICP (B) | A/B  | Mixed-gas ICP (C)                       | Ar ICP (D) | D/C  |         |
| Al I    | 176.641         | 16.30±1.0                              | 1.14±0.20  | 14.3 | 50                                      | 1500       | 30   | 32      |
| As I    | 193.759         | 76±3                                   | 35.5±1.0   | 2.15 | 0.7                                     | 3          | 4    | 5.1     |
| As I    | 197.262         | 51±5                                   | 17±1       | 3.00 | 0.3                                     | 7          | 23   | 7.0     |
| As I    | 228.812         | 106±6                                  | 38±2.0     | 2.80 | 0.3                                     | 6          | 20   | 5.2     |
| Ba II   | 455.404         | 890±90                                 | 161±17     | 5.58 | 8                                       | 150        | 19   | 10      |
| Cd II   | 226.502         | 11.5±1.5                               | 0.90±0.10  | 12.7 | 2                                       | 20         | 10   | 0.50    |
| Cr II   | 205.618         | 60±2                                   | 14.2±1.0   | 4.30 | 1                                       | 7          | 7    | 1.3     |
| Cr II   | 267.716         | 304±12                                 | 55.0±5.0   | 5.40 | 0.2                                     | 1          | 5    | 0.5     |
| Cr II   | 283.563         | 430±10                                 | 55.5±5.0   | 7.75 | 0.05                                    | 0.7        | 14   | 0.4     |
| Cu II   | 165.532         | 0.51±0.08                              | 0.88±0.30  | 0.58 | 80                                      | 40         | 0.5  | 1.7     |
| Cu I    | 327.396         | 2350±50                                | 547±20     | 4.30 | 0.04                                    | 0.6        | 15   | 3.9     |
| Fe II   | 238.204         | 10.5±1.0                               | 3.9±0.3    | 2.7  | 200                                     | 10000      | 50   | 11      |
| Fe II   | 241.331         | 8±1                                    | 3.4±0.20   | 2.3  | 30                                      | 2000       | 67   | 10      |
| Fe II   | 244.451         | 0.95±0.08                              | 0.23±0.05  | 4.1  | 40                                      | 4000       | 100  | 3.4     |
| Mg II   | 279.079         | 22±0.5                                 | 2.0±0.1    | 11.0 | 10                                      | 30         | 3    | 19      |
| Mn II   | 259.373         | 360±23                                 | 88±3       | 4.1  | 0.3                                     | 3          | 10   | 16      |
| Mn II   | 294.921         | 335±10                                 | 80±4       | 4.2  | 0.1                                     | 0.5        | 5    | 17      |
| Mo II   | 281.615         | 575±30                                 | 186±14     | 3.10 | 0.03                                    | 0.3        | 10   | 4.0     |
| Ni II   | 174.828         | 43±5                                   | 6.6±1.0    | 6.5  | 2                                       | 15         | 7.5  | 1.0     |
| P I     | 177.495         | 9.1±1.5                                | 9.0±1.0    | 1.0  | 20                                      | 100        | 5    | 9.0     |
| Pb II   | 172.680         | 8.9±0.7                                | 1.7±0.2    | 5.3  | 6                                       | 30         | 5    | 1.0     |
| Pb II   | 220.353         | 520±40                                 | 13±3       | 40   | 0.03                                    | 2          | 67   | 1.2     |
| Pb I    | 261.418         | 52±2                                   | 7.0±0.5    | 7.5  | 0.4                                     | 1          | 2.5  | 0.6     |
| Pb I    | 405.778         | 52±7                                   | 33±10      | 1.6  | 8                                       | 10         | 1.25 | 0.6     |
| S I     | 180.731         | 19±3                                   | 10.0±1.0   | 1.9  | 8.5                                     | 4          | 0.47 | 11      |
| Sb I    | 217.581         | 1020±100                               | 105±5      | 9.53 | 0.02                                    | 0.15       | 7.5  | 1.0     |
| Sr II   | 407.771         | 1060±50                                | 276±10     | 3.84 | 6                                       | 10         | 1.7  | 13      |
| V II    | 331.071         | 65±4                                   | 78±6       | 0.83 | 0.7                                     | 20         | 28.6 | 0.5     |
| Zn II   | 202.613         | 125±7                                  | 27±4       | 4.6  | 1                                       | 40         | 40   | 0.6     |
| Zn II   | 206.200         | 55±8                                   | 11±2       | 5.0  | 6                                       | 90         | 15   | 11      |
